# Supplementary material for: The role of nanosized zeolite Y in the H2-free catalytic deoxygenation of triolein
Source: Royal Society of Chemistry journal article supplement (doi:10.1039/c8cy01877d), 2019-01-01
Supplement: c8cy01877d1.pdf [file c8cy01877d1.pdf]

### Supporting Information

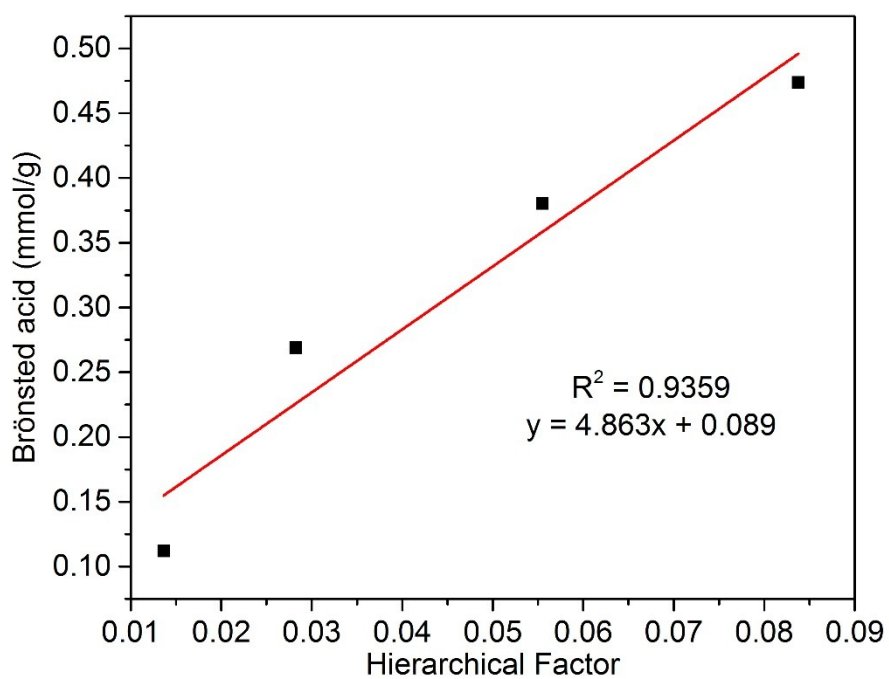

Fig. S1: Relationship between the amount of Brønsted acid site and the H.F value of the synthesized zeolites

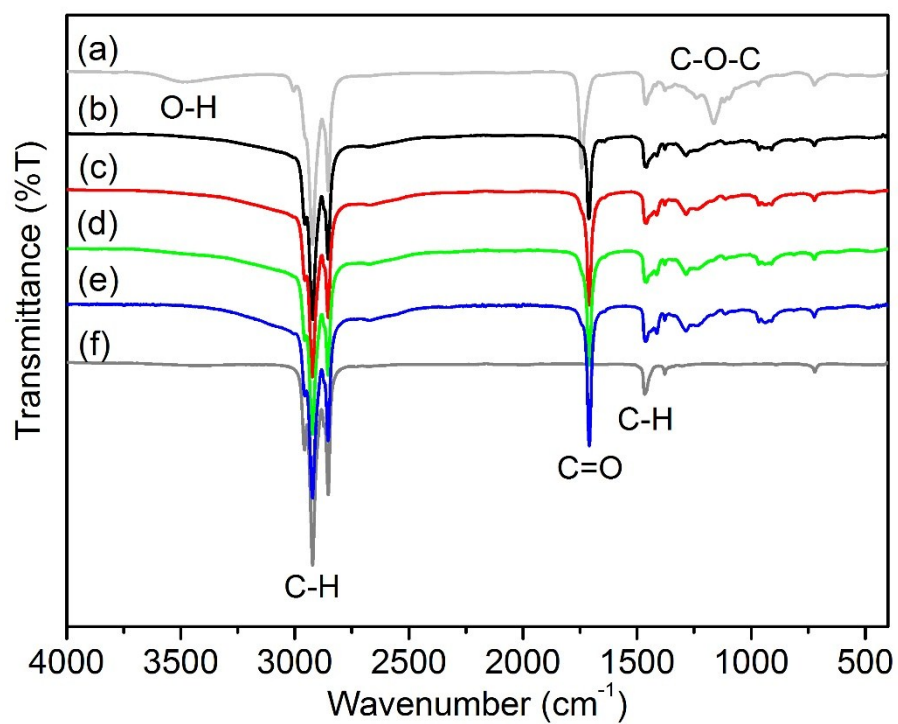

Fig. S2: FTIR spectra of (a) triolein, liquid products obtained after reacted with (b) Y20, (c) Y65, (d) Y380, (e) Y2750 at 380 °C for 4 h, and (f) dodecane

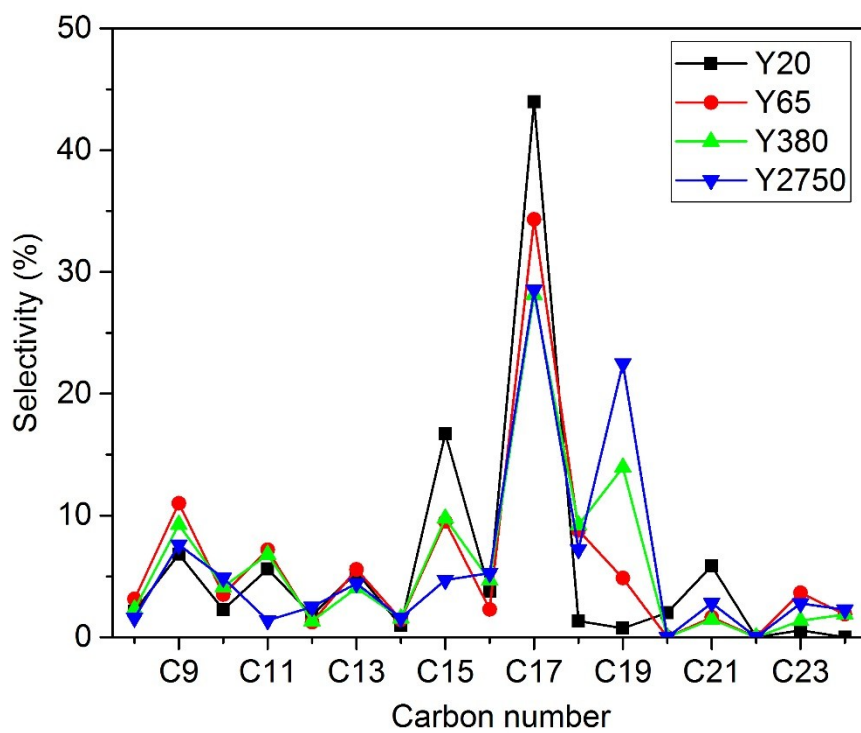

Fig. S3: Carbon selectivity of the deoxygenized liquid product

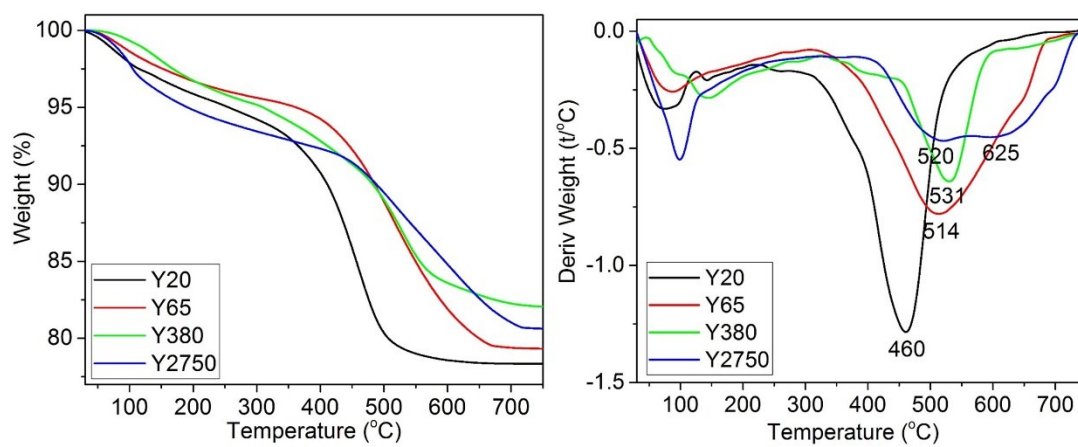

Fig. S4: TGA/DTG profiles of Y20, Y65, Y380 and Y2750 after reacted for 3 consecutive runs at 380 °C for 4 h

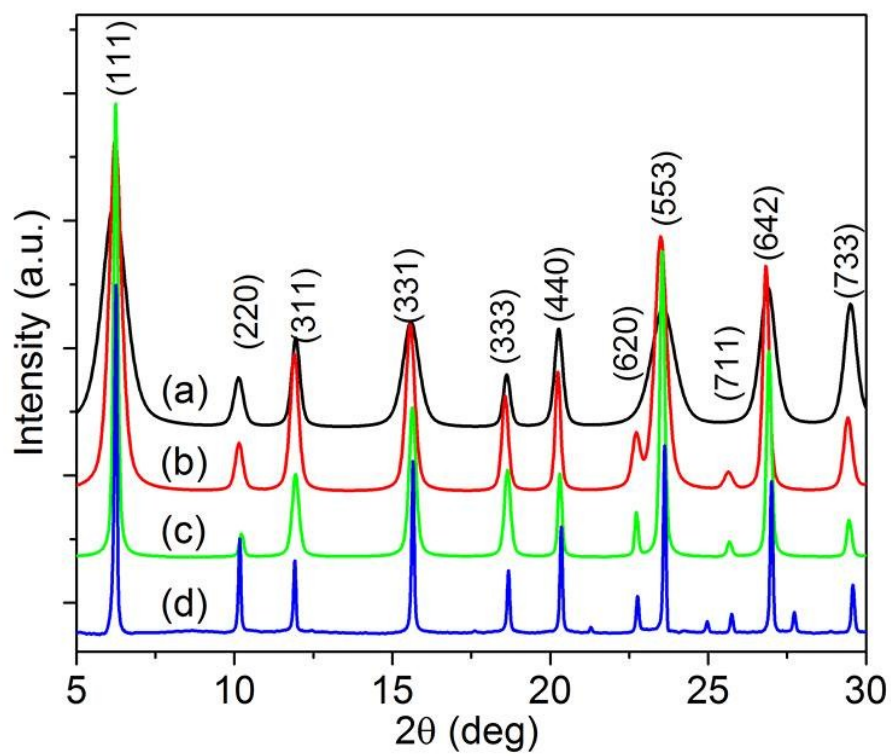

Fig. S5: XRD diffractograms of (a) Y20, (b) Y65, (c) Y380 and (d) Y2750 after 3 consecutive catalytic reaction runs at 380 °C for 4 h
